# Supplementary material
Source: publisher figshare collection journal article supplement (https://geolsoc.figshare.com/articles/dataset/_/3452954)
Supplement: Supplementary file 1 [file 1]

Supplementary Table 4. Structural formulae of plagioclase used for thermometry.

| Sample   | Si     | Al     | Fe <sup>2+</sup> | Ca     | Na     | K      |
|----------|--------|--------|------------------|--------|--------|--------|
| JAB15D   | 2.7993 | 1.2065 | 0.0052           | 0.203  | 0.7606 | 0.0062 |
| JAB18A   | 2.6906 | 1.3144 | 0.0011           | 0.3156 | 0.6566 | 0.0045 |
| JAB21B   | 2.7341 | 1.2726 | 0.0018           | 0.2615 | 0.7124 | 0.0068 |
| JAB146A1 | 2.7998 | 1.2047 | 0.01             | 0.2042 | 0.7536 | 0.0045 |
| JAB152A3 | 2.8823 | 1.1248 | 0.0004           | 0.117  | 0.8544 | 0.0073 |
| JAB156A1 | 2.8081 | 1.2024 | 0.0026           | 0.1933 | 0.7637 | 0.0051 |
| JAB159A  | 2.8237 | 1.1821 | 0.0011           | 0.1877 | 0.7775 | 0.004  |
| JAB160A  | 2.8313 | 1.1745 | 0.0041           | 0.175  | 0.7904 | 0.0028 |
| JAB161A  | 2.7807 | 1.2275 | 0.003            | 0.2206 | 0.7426 | 0.0051 |
| JAB162A  | 2.7365 | 1.269  | 0.0015           | 0.2685 | 0.703  | 0.004  |
| JAB164A  | 2.7528 | 1.2522 | 0.0033           | 0.2505 | 0.7188 | 0.0057 |
| JAB235A1 | 2.7358 | 1.265  | 0.0048           | 0.2709 | 0.7051 | 0.0051 |
| JAB240D1 | 2.669  | 1.338  | 0.0048           | 0.3307 | 0.6357 | 0.0034 |
| JAB242A  | 2.8376 | 1.1747 | 0.0026           | 0.1684 | 0.7795 | 0.004  |
| JAB245A  | 2.6916 | 1.3252 | 0.0045           | 0.2831 | 0.6553 | 0.0274 |
| JAB253A  | 2.7985 | 1.2083 | 0.0041           | 0.2025 | 0.7637 | 0.0045 |
| JAB255A  | 2.7236 | 1.2849 | 0.0063           | 0.2705 | 0.6922 | 0.0051 |
| JAB257A  | 2.8123 | 1.1982 | 0.0055           | 0.1913 | 0.7584 | 0.0039 |
| JAB258D  | 2.7121 | 1.2949 | 0.0011           | 0.2858 | 0.6885 | 0.0045 |
| JAB261B1 | 2.7534 | 1.2532 | 0.0015           | 0.248  | 0.723  | 0.0045 |
| JAB262A1 | 2.7293 | 1.2809 | 0.0022           | 0.2713 | 0.6886 | 0.0045 |
| JAB264A2 | 2.7323 | 1.2726 | 0.0007           | 0.2704 | 0.7061 | 0.0045 |
| JAB268A  | 2.6761 | 1.3376 | 0.0041           | 0.3229 | 0.6231 | 0.0057 |
| JAB269B  | 2.7483 | 1.2581 | 0.0048           | 0.2519 | 0.7139 | 0.0051 |
| JAB277D1 | 2.6803 | 1.3251 | 0.0105           | 0.3151 | 0.6438 | 0.0085 |
