# Supplementary material
Source: publisher figshare collection journal article supplement (https://geolsoc.figshare.com/articles/dataset/_/3452954)
Supplement: Supplementary file 2 [file 1]

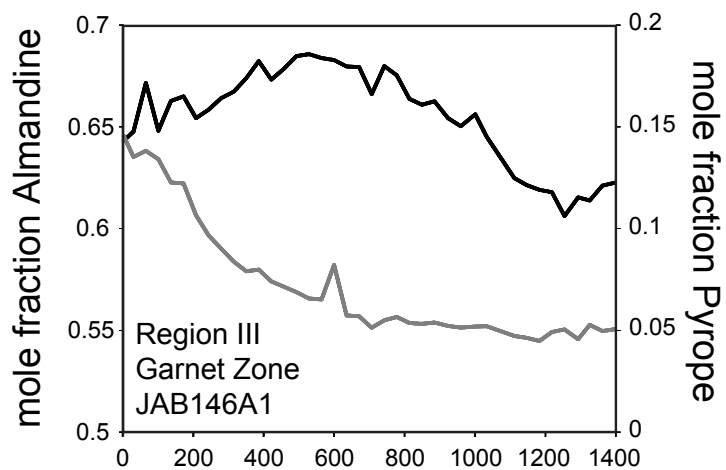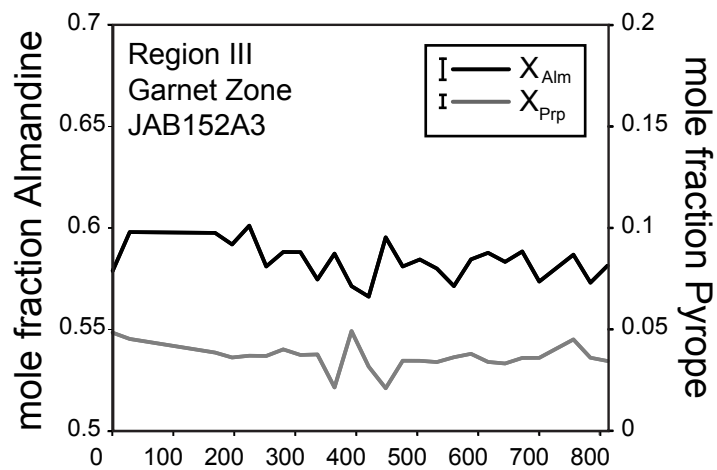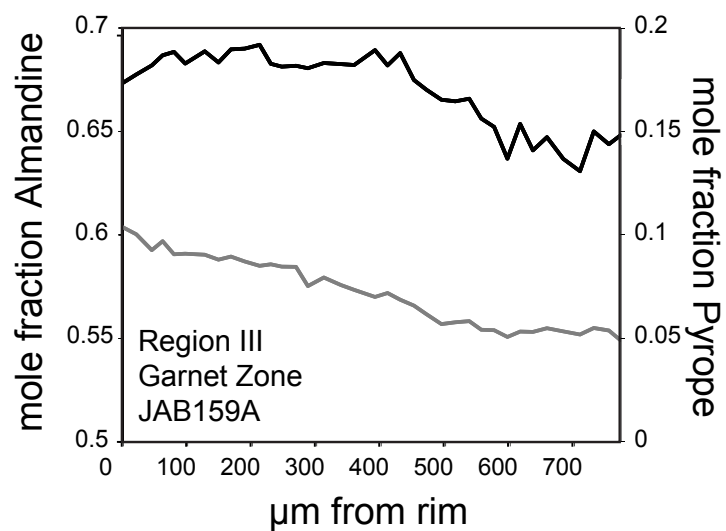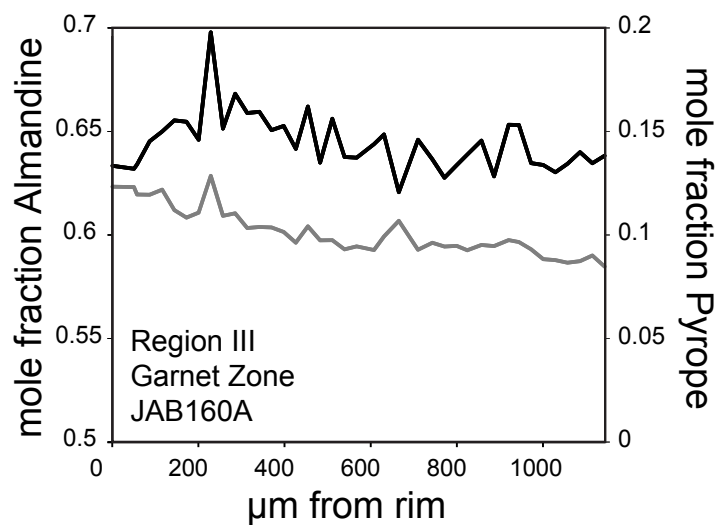

Vorhies and Ague, supplementary Fig. 1

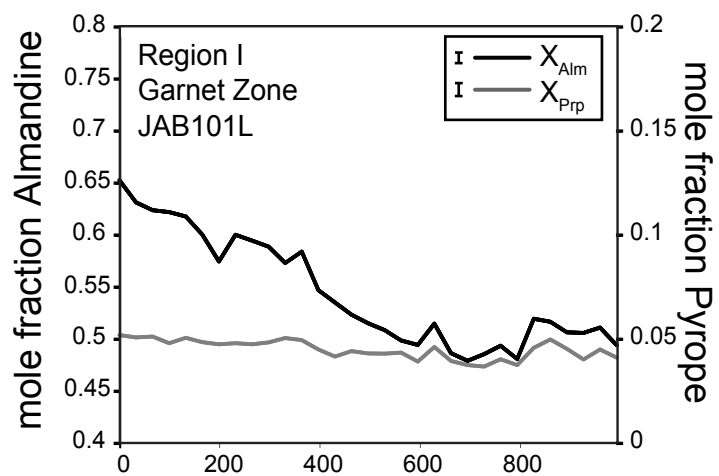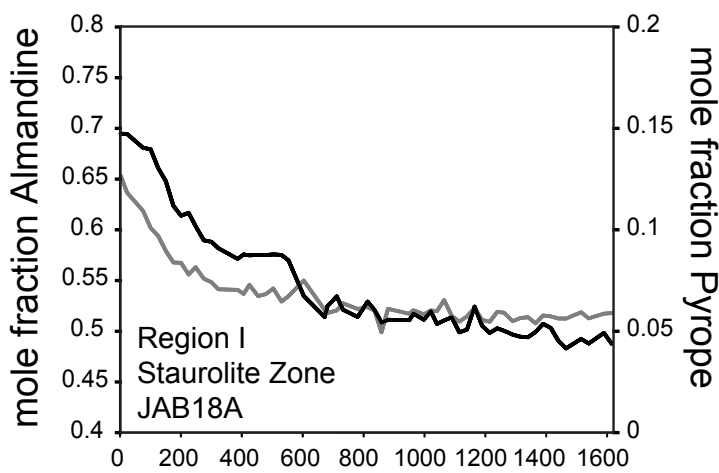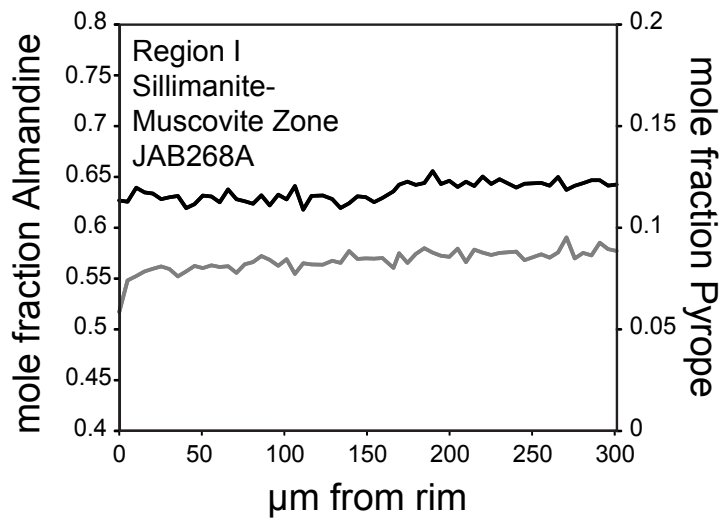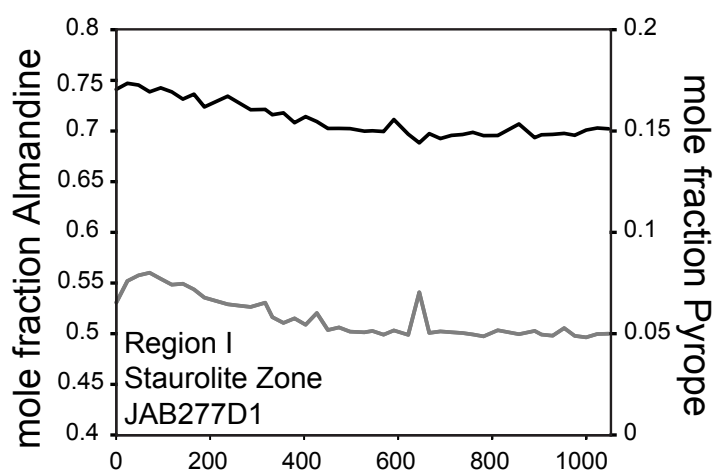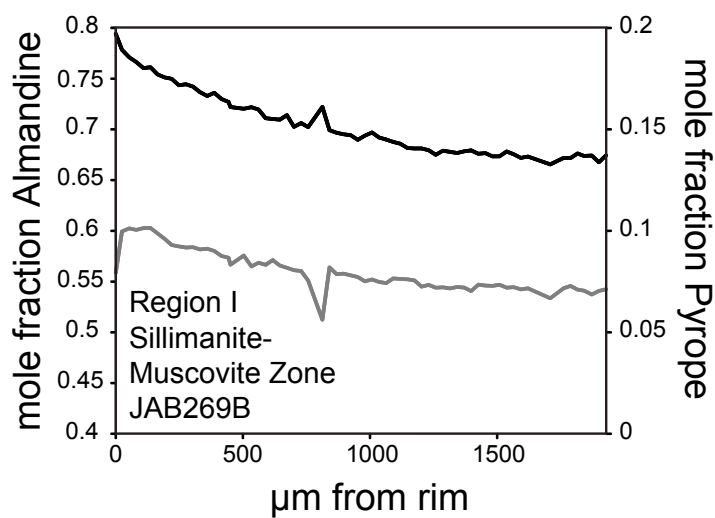

Vorhies and Ague, Supplementary Fig. 2

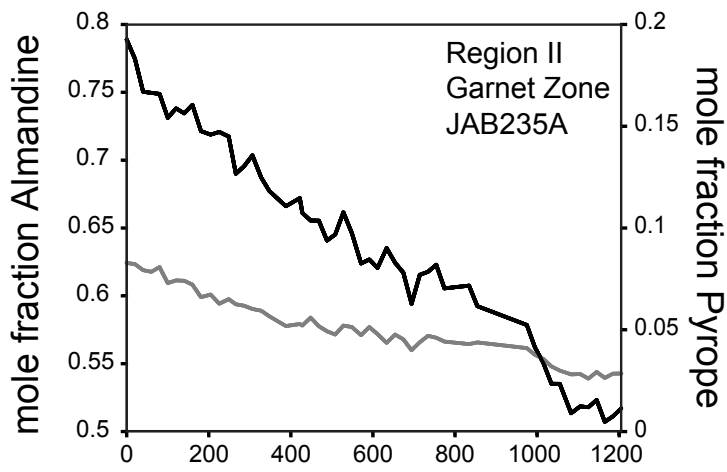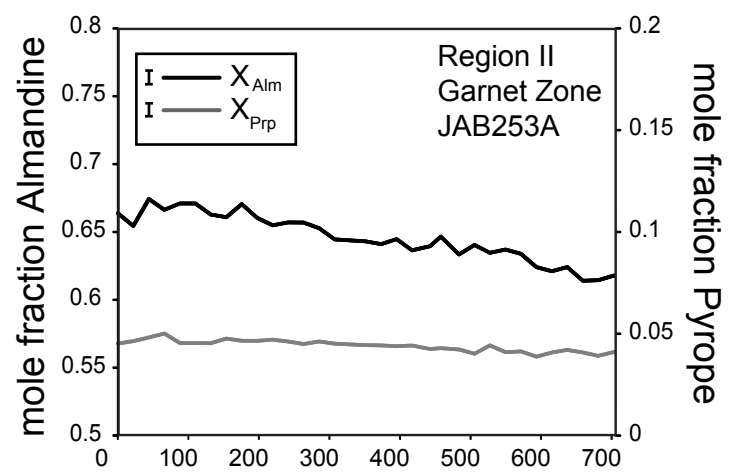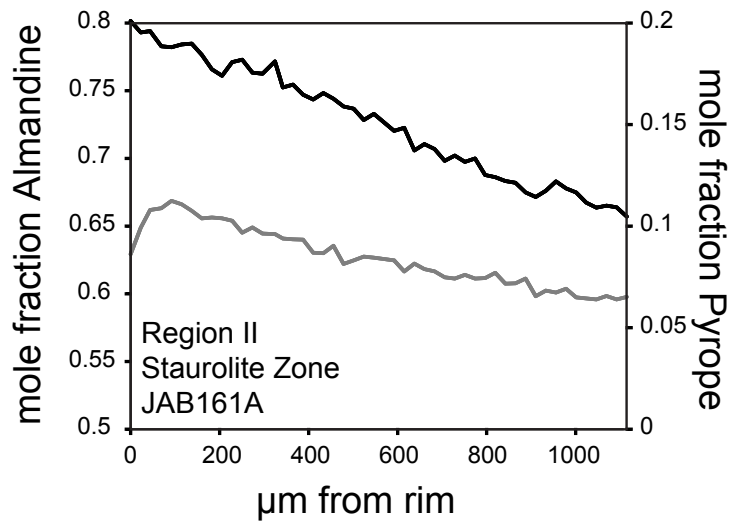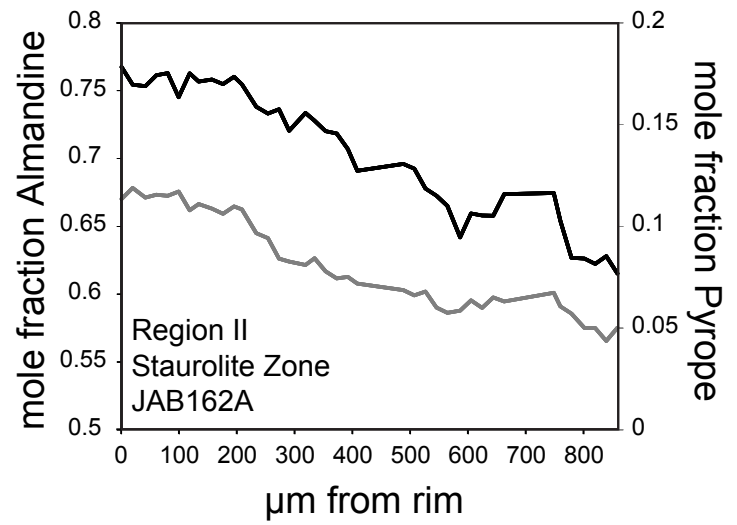

Vorhies and Ague, supplementary fig. 3



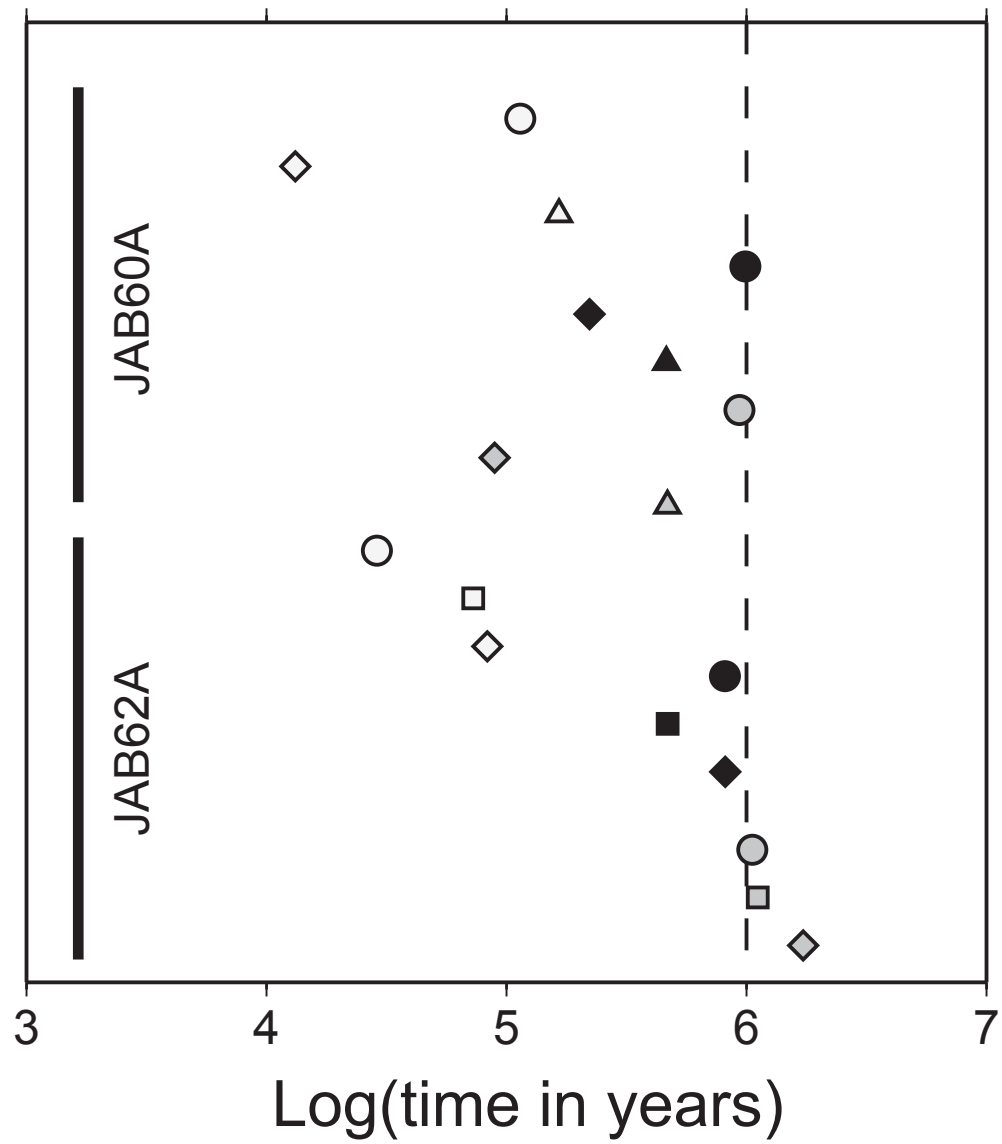

**Supplementary Figure 5.** Best-fit diffusion modeling results. Open symbols: calibration of Carlson (2006); filled symbols Faryad & Chakraborty (2005); gray symbols Faryad & Chakraborty (2005) + Vielzuef *et al.* (2007) for grossular. Circles: pyrope; diamonds: grossular; triangles: almandine; squares: spessartine.
