# Supplementary material
Source: publisher figshare collection journal article supplement (https://geolsoc.figshare.com/articles/dataset/_/3452954)
Supplement: Supplementary file 3 [file 1]

Supplementary Table 2. Structural formulae of garnets used for thermobarometry

| Sample   | Si     | Al     | Fe <sup>2+</sup> | Ca     | Mg     | Mn     | Ti     |
|----------|--------|--------|------------------|--------|--------|--------|--------|
| JAB15D   | 3.0177 | 1.9836 | 1.9072           | 0.1274 | 0.2689 | 0.6857 | 0      |
| JAB18A   | 3.0199 | 1.9979 | 2.0593           | 0.1573 | 0.3751 | 0.3717 | 0      |
| JAB21B   | 3.0121 | 1.9882 | 1.9657           | 0.1298 | 0.2537 | 0.6444 | 0      |
| JAB146A1 | 3.007  | 1.9859 | 1.9922           | 0.6858 | 0.3041 | 0.0133 | 0.0059 |
| JAB152A3 | 3.0151 | 1.9795 | 1.9097           | 0.7656 | 0.995  | 0.2053 | 0.0102 |
| JAB156A1 | 3.0161 | 2.0067 | 2.1544           | 0.1327 | 0.2619 | 0.4087 | 0      |
| JAB159A  | 3.0054 | 2.0118 | 2.0105           | 0.6525 | 0.2987 | 0      | 0.0048 |
| JAB160A  | 3.0127 | 1.9892 | 1.9643           | 0.6906 | 0.2759 | 0.0529 | 0.0036 |
| JAB161A  | 3.0012 | 1.9985 | 2.3815           | 0.177  | 0.3239 | 0.1175 | 0      |
| JAB162A  | 3.0324 | 1.9799 | 2.2765           | 0.2294 | 0.336  | 0.1234 | 0      |
| JAB164A  | 3.0091 | 2.0005 | 2.1738           | 0.3274 | 0.2767 | 0.2032 | 0      |
| JAB235A1 | 3.0373 | 1.9884 | 2.0863           | 0.3862 | 0.1991 | 0.2712 | 0      |
| JAB240D1 | 3.0186 | 1.9671 | 2.2022           | 0.4381 | 0.3339 | 0.0344 | 0.0018 |
| JAB242A  | 3.0285 | 1.9868 | 2.1799           | 0.1701 | 0.3184 | 0.2907 | 0.0018 |
| JAB245A  | 3.021  | 1.9909 | 2.2662           | 0.2087 | 0.3959 | 0.0902 | 0.0054 |
| JAB253A  | 3.0236 | 2.0064 | 1.9593           | 0.3057 | 0.1321 | 0.546  | 0      |
| JAB255A  | 3.0229 | 1.9904 | 2.3724           | 0.2272 | 0.3519 | 0.0135 | 0.0018 |
| JAB257A  | 3.0227 | 1.9788 | 2.2196           | 0.4615 | 0.2531 | 0.0522 | 0      |
| JAB258A  | 3.0376 | 1.9875 | 2.316            | 0.169  | 0.3592 | 0.0946 | 0.0024 |
| JAB261B1 | 3.0025 | 1.9783 | 2.3698           | 0.1529 | 0.3882 | 0.1106 | 0.003  |
| JAB262A1 | 3.0229 | 1.999  | 2.2922           | 0.1729 | 0.3729 | 0.1141 | 0.0018 |
| JAB264A2 | 3.0052 | 2.0218 | 2.38             | 0.1541 | 0.3645 | 0.0582 | 0      |
| JAB268A  | 3.0119 | 1.9967 | 1.8644           | 0.2265 | 0.221  | 0.6681 | 0.0006 |
| JAB269B  | 3.0282 | 1.9948 | 2.2724           | 0.1103 | 0.301  | 0.2664 | 0.0006 |
| JAB277D1 | 3.0158 | 1.9745 | 2.2119           | 0.1735 | 0.2402 | 0.3691 | 0.0061 |
