# Supplementary material
Source: publisher figshare collection journal article supplement (https://geolsoc.figshare.com/articles/dataset/_/3452954)
Supplement: Supplementary file 4 [file 1]

Table 5. Structural formulae of muscovite used for thermobarometry.

| Sample   | Si     | Aliv   | Alvi   | Fe2+   | Ca     | Na     | K      | Mg     |
|----------|--------|--------|--------|--------|--------|--------|--------|--------|
| JAB15D   | 3.1258 | 0.8742 | 1.8042 | 0.0899 | 0      | 0.103  | 0.8214 | 0.0972 |
| JAB18A   | 3.1031 | 0.8969 | 1.8326 | 0.0901 | 0.0022 | 0.1109 | 0.8262 | 0.0793 |
| JAB21B   | 3.0831 | 0.9169 | 1.8285 | 0.099  | 0      | 0.0941 | 0.8347 | 0.0644 |
| JAB146A1 | 3.2275 | 0.7725 | 1.702  | 0.1126 | 0      | 0.115  | 0.8128 | 0.1868 |
| JAB152A3 | 3.2208 | 0.7792 | 1.7293 | 0.1444 | 0      | 0.085  | 0.8244 | 0.1589 |
| JAB156A1 | 3.0951 | 0.9049 | 1.8644 | 0.0787 | 0.0014 | 0.1281 | 0.7898 | 0.0627 |
| JAB159A  | 3.2445 | 0.7555 | 1.7054 | 0.1073 | 0.0014 | 0.1172 | 0.7892 | 0.1982 |
| JAB160A  | 3.2071 | 0.7929 | 1.7489 | 0.0922 | 0.0007 | 0.1373 | 0.7713 | 0.1614 |
| JAB161A  | 3.0939 | 0.9061 | 1.8226 | 0.1271 | 0      | 0.1654 | 0.7873 | 0.0666 |
| JAB162A  | 3.1044 | 0.8956 | 1.8308 | 0.1026 | 0      | 0.1797 | 0.7665 | 0.0686 |
| JAB164A  | 3.0994 | 0.9006 | 1.8215 | 0.0967 | 0.0007 | 0.1076 | 0.8272 | 0.0827 |
| JAB235A1 | 3.1389 | 0.8611 | 1.8037 | 0.11   | 0      | 0.1489 | 0.7831 | 0.0946 |
| JAB240D1 | 3.074  | 0.926  | 1.8882 | 0.0543 | 0.0007 | 0.2026 | 0.7418 | 0.0609 |
| JAB242A  | 3.07   | 0.93   | 1.8693 | 0.0645 | 0      | 0.1746 | 0.7514 | 0.0676 |
| JAB245A  | 3.1308 | 0.8692 | 1.8095 | 0.0832 | 0.0249 | 0.1428 | 0.7473 | 0.089  |
| JAB253A  | 3.1628 | 0.8372 | 1.7908 | 0.1155 | 0.0007 | 0.1125 | 0.8086 | 0.1025 |
| JAB255A  | 3.1189 | 0.8811 | 1.8587 | 0.0619 | 0.0014 | 0.2165 | 0.7264 | 0.0837 |
| JAB257A  | 3.136  | 0.864  | 1.8373 | 0.0725 | 0.0007 | 0.172  | 0.7692 | 0.0985 |
| JAB258D  | 3.1062 | 0.8938 | 1.8042 | 0.0966 | 0      | 0.1185 | 0.8099 | 0.0713 |
| JAB261B1 | 3.1113 | 0.8887 | 1.8387 | 0.1175 | 0      | 0.1382 | 0.8123 | 0.0739 |
| JAB262A1 | 3.1035 | 0.8965 | 1.8054 | 0.1039 | 0.0007 | 0.1146 | 0.8243 | 0.0701 |
| JAB264A2 | 3.0937 | 0.9063 | 1.8252 | 0.0697 | 0.0007 | 0.1383 | 0.8052 | 0.0706 |
| JAB268A  | 3.112  | 0.888  | 1.7888 | 0.1378 | 0      | 0.0838 | 0.8552 | 0.0785 |
| JAB269B  | 3.1174 | 0.8826 | 1.8376 | 0.0987 | 0.0021 | 0.1397 | 0.7778 | 0.0726 |
| JAB277D1 | 3.1632 | 0.8368 | 1.8529 | 0.1193 | 0.0007 | 0.1922 | 0.7299 | 0.0424 |

| Mn     | Ti     | F      |
|--------|--------|--------|
| 0.0011 | 0.0349 | 0.0213 |
| 0.0011 | 0.0228 | 0.0255 |
| 0.0011 | 0.0355 | 0.0315 |
| 0.0011 | 0.0271 | 0.0295 |
| 0.0011 | 0.0183 | 0.0171 |
| 0.0006 | 0.0226 | 0.0169 |
| 0      | 0.0235 | 0.0252 |
| 0.0006 | 0.0256 | 0.0254 |
| 0.0006 | 0.0185 | 0.0232 |
| 0.0006 | 0.0236 | 0.019  |
| 0.0011 | 0.0347 | 0.0233 |
| 0.0023 | 0.0171 | 0.0359 |
| 0      | 0.0202 | 0.0042 |
| 0.0006 | 0.0326 | 0      |
| 0      | 0.0364 | 0.0105 |
| 0.0011 | 0.0176 | 0.0338 |
| 0      | 0.0144 | 0.0104 |
| 0.0006 | 0.0166 | 0.0127 |
| 0.0011 | 0.0495 | 0.0168 |
| 0      | 0.0077 | 0.0086 |
| 0      | 0.048  | 0.0212 |
| 0.0023 | 0.0481 | 0.0084 |
| 0.0006 | 0.034  | 0.0128 |
| 0.0011 | 0.0221 | 0.0148 |
| 0.0006 | 0.0065 | 0.0042 |
