# Supplementary material
Source: publisher figshare collection journal article supplement (https://geolsoc.figshare.com/articles/dataset/_/3452954)
Supplement: Supplementary file 5 [file 1]

Supplementary Table 1. Mineral compositions in weight percent

| Sample name | Mineral     | SiO <sub>2</sub> | Al <sub>2</sub> O <sub>3</sub> | FeO   | MgO   | CaO  | MnO   | TiO <sub>2</sub> |
|-------------|-------------|------------------|--------------------------------|-------|-------|------|-------|------------------|
| JAB15D      | Biotite     | 35.95            | 18.17                          | 19.93 | 9.3   | 0.03 | 0.27  | 2.35             |
|             | Garnet      | 37.31            | 20.81                          | 28.2  | 2.23  | 1.47 | 10.01 | 0                |
|             | Plagioclase | 63.22            | 23.12                          | 0.14  | -     | 4.28 | -     | -                |
|             | Muscovite   | 46.5             | 33.81                          | 1.6   | 0.97  | 0    | 0.02  | 0.69             |
| JAB18A      | Biotite     | 36.51            | 19.18                          | 18.98 | 10.14 | 0.01 | 0.17  | 1.19             |
|             | Garnet      | 38.05            | 21.36                          | 31.03 | 3.17  | 1.85 | 5.53  | -                |
|             | Plagioclase | 60.38            | 25.03                          | 0.03  | -     | 6.61 | -     | -                |
|             | Muscovite   | 46.09            | 34.4                           | 1.6   | 0.79  | 0.03 | 0.02  | 0.45             |
| JAB21B      | Biotite     | 35.71            | 19.05                          | 22.43 | 7.48  | 0    | 0.22  | 2.17             |
|             | Garnet      | 37.53            | 21.02                          | 29.29 | 2.12  | 1.51 | 9.48  | -                |
|             | Plagioclase | 61.83            | 24.42                          | 0.05  | -     | 5.52 | -     | -                |
|             | Muscovite   | 46.36            | 35.03                          | 1.78  | 0.65  | 0    | 0.02  | 0.71             |
| JAB146A1    | Biotite     | 37.64            | 17.33                          | 18.96 | 10.53 | 0.02 | 0     | 1.43             |
|             | Garnet      | 38.33            | 21.48                          | 30.37 | 2.6   | 8.16 | 0.2   | 0.1              |
|             | Plagioclase | 63.02            | 23.01                          | 0.27  | -     | 4.29 | -     | -                |
|             | Muscovite   | 48.42            | 31.5                           | 2.02  | 1.88  | 0    | 0.02  | 0.54             |
| JAB152A3    | Biotite     | 36.7             | 17.2                           | 21.99 | 8.78  | 0.03 | 0.12  | 1.57             |
|             | Garnet      | 37.93            | 21.13                          | 28.73 | 0.84  | 8.99 | 3.05  | 0.17             |
|             | Plagioclase | 65.74            | 21.77                          | 0.01  | -     | 2.49 | -     | -                |
|             | Muscovite   | 47.74            | 31.55                          | 2.56  | 1.58  | 0    | 0.02  | 0.36             |
| JAB156A1    | Biotite     | 35.89            | 18.29                          | 21.52 | 8.51  | 0.01 | 0.14  | 2.26             |
|             | Garnet      | 37.25            | 21.03                          | 31.82 | 2.17  | 1.53 | 5.96  | -                |
|             | Plagioclase | 63.66            | 23.13                          | 0.07  | -     | 4.09 | -     | -                |
|             | Muscovite   | 46.39            | 35.22                          | 1.41  | 0.63  | 0.02 | 0.01  | 0.45             |
| JAB159A     | Biotite     | 37.22            | 17.72                          | 18.07 | 11.38 | 0.02 | 0     | 1.49             |
|             | Garnet      | 37.5             | 21.3                           | 30    | 2.5   | 7.6  | 0     | 0.08             |
|             | Plagioclase | 63.65            | 22.61                          | 0.03  | -     | 3.95 | -     | -                |
|             | Muscovite   | 48.82            | 31.42                          | 1.93  | 2     | 0.02 | 0     | 0.47             |
| JAB160A     | Biotite     | 37.23            | 17.78                          | 17.41 | 11.8  | 0    | 0.05  | 1.54             |
|             | Garnet      | 38.09            | 21.34                          | 29.7  | 2.34  | 8.15 | 0.79  | 0.06             |
|             | Plagioclase | 63.61            | 22.39                          | 0.11  | -     | 3.67 | -     | -                |
|             | Muscovite   | 48               | 32.28                          | 1.65  | 1.62  | 0.01 | 0.01  | 0.51             |
| JAB161A     | Biotite     | 35.87            | 17.82                          | 21.82 | 8.99  | 0    | 0.05  | 1.74             |
|             | Garnet      | 37.43            | 21.15                          | 35.52 | 2.71  | 2.06 | 1.73  | 0                |
|             | Plagioclase | 62.79            | 23.52                          | 0.08  | -     | 4.65 | -     | -                |
|             | Muscovite   | 46.42            | 34.74                          | 2.28  | 0.67  | 0    | 0.01  | 0.37             |
| JAB162A     | Biotite     | 36.08            | 18.42                          | 20.15 | 10.1  | 0.01 | 0.03  | 1.7              |
|             | Garnet      | 37.67            | 20.87                          | 33.82 | 2.8   | 2.66 | 1.81  | 0                |
|             | Plagioclase | 61.58            | 24.23                          | 0.04  | -     | 5.64 | -     | -                |
|             | Muscovite   | 46.55            | 34.69                          | 1.84  | 0.69  | 0    | 0.01  | 0.47             |
| JAB164A     | Biotite     | 35.99            | 17.62                          | 22.46 | 8.45  | 0    | 0.1   | 2.31             |
|             | Garnet      | 37.12            | 20.94                          | 32.07 | 2.29  | 3.77 | 2.96  | 0                |
|             | Plagioclase | 61.92            | 23.9                           | 0.09  | -     | 5.26 | -     | -                |
|             | Muscovite   | 46.36            | 34.55                          | 1.73  | 0.83  | 0.01 | 0.02  | 0.69             |
| JAB235A1    | Biotite     | 36.16            | 17.45                          | 21.41 | 9.22  | 0.03 | 0.06  | 1.68             |

|          |             |       |       |       |       |      |      |       |
|----------|-------------|-------|-------|-------|-------|------|------|-------|
|          | Garnet      | 37.75 | 20.97 | 31.01 | 1.66  | 4.48 | 3.98 | 0     |
|          | Plagioclase | 61.68 | 24.2  | 0.13  | -     | 5.7  | -    | -     |
|          | Muscovite   | 46.99 | 33.85 | 1.97  | 0.95  | 0    | 0.04 | 0.34  |
| JAB240D1 | Biotite     | 36.79 | 19.13 | 18.66 | 11.01 | 0.03 | 0.05 | 1.51  |
|          | Garnet      | 37.87 | 20.94 | 33.04 | 2.81  | 5.13 | 0.51 | 0.03  |
|          | Plagioclase | 59.83 | 25.45 | 0.13  | -     | 6.92 | -    | -     |
|          | Muscovite   | 45.88 | 35.64 | 0.97  | 0.61  | 0.01 | 0    | 0.4   |
| JAB242A  | Biotite     | 36.35 | 18.56 | 19.27 | 10.23 | 0.01 | 0.07 | 1.92  |
|          | Garnet      | 37.58 | 20.92 | 32.35 | 2.65  | 1.97 | 4.26 | 0.03  |
|          | Plagioclase | 64.08 | 22.51 | 0.07  | -     | 3.55 | -    | -     |
|          | Muscovite   | 45.34 | 35.08 | 1.14  | 0.67  | 0    | 0.01 | 0.64  |
| JAB245A  | Biotite     | 36.57 | 18.72 | 18.38 | 10.57 | 0    | 0.02 | 1.82  |
|          | Garnet      | 38    | 21.25 | 34.09 | 3.34  | 2.45 | 1.34 | 0.09  |
|          | Plagioclase | 60.2  | 25.15 | 0.12  | -     | 5.91 | -    | -     |
|          | Muscovite   | 47.19 | 34.26 | 1.5   | 0.9   | 0.35 | 0    | 0.73  |
| JAB253A  | Biotite     | 35.82 | 18.61 | 22.34 | 8.08  | 0.03 | 0.12 | 1.49  |
|          | Garnet      | 37.19 | 20.94 | 28.82 | 1.09  | 3.51 | 7.93 | 0     |
|          | Plagioclase | 63.08 | 23.11 | 0.11  | -     | 4.26 | -    | -     |
|          | Muscovite   | 47.4  | 33.42 | 2.07  | 1.03  | 0.01 | 0.02 | 0.35  |
| JAB255A  | Biotite     | 36.04 | 18.18 | 20.12 | 10.59 | 0.01 | 0.03 | 1.44  |
|          | Garnet      | 37.91 | 21.18 | 35.58 | 2.96  | 2.66 | 0.2  | 0.03  |
|          | Plagioclase | 61.48 | 24.61 | 0.17  | -     | 5.7  | -    | -     |
|          | Muscovite   | 47.21 | 35.19 | 1.12  | 0.85  | 0.02 | 0    | 0.29  |
| JAB257A  | Biotite     | 36.5  | 17.91 | 20.03 | 10.18 | 0    | 0.05 | 1.61  |
|          | Garnet      | 37.75 | 20.97 | 33.15 | 2.12  | 5.38 | 0.77 | 0     |
|          | Plagioclase | 63.62 | 23    | 0.15  | -     | 4.04 | -    | -     |
|          | Muscovite   | 47.01 | 34.36 | 1.3   | 0.99  | 0.01 | 0.01 | 0.33  |
|          | Ilmenite    | 0.03  | 0.02  | 48.09 | 0.33  | 0.09 | 0.27 | 50.8  |
|          | Rutile      | 0.23  | 0.38  | 0.62  | 0     | 0.07 | 0.08 | 98.56 |
| JAB258D  | Biotite     | 36.15 | 18.78 | 20.32 | 9.17  | 0.02 | 0.03 | 2.41  |
|          | Garnet      | 38.33 | 21.28 | 34.95 | 3.04  | 1.99 | 1.41 | 0.04  |
|          | Plagioclase | 61.09 | 24.75 | 0.03  | -     | 6.01 | -    | -     |
|          | Muscovite   | 46.77 | 34.47 | 1.74  | 0.72  | 0    | 0.02 | 0.99  |
| JAB261B1 | Biotite     | 35.58 | 18.52 | 20.73 | 9.33  | 0.01 | 0.02 | 2.19  |
|          | Garnet      | 37.24 | 20.82 | 35.15 | 3.23  | 1.77 | 1.62 | 0.05  |
|          | Plagioclase | 62.09 | 23.98 | 0.04  | -     | 5.22 | -    | -     |
|          | Muscovite   | 45.83 | 34.09 | 2.07  | 0.73  | 0    | 0    | 0.15  |
| JAB262A1 | Biotite     | 35.83 | 18.4  | 20.27 | 9.01  | 0.02 | 0.03 | 2.57  |
|          | Garnet      | 37.46 | 21.02 | 33.97 | 3.1   | 2    | 1.67 | 0.03  |
|          | Plagioclase | 61.55 | 24.51 | 0.06  | -     | 5.71 | -    | -     |
|          | Muscovite   | 46.2  | 34.13 | 1.85  | 0.7   | 0.01 | 0    | 0.95  |
| JAB264A2 | Biotite     | 35.97 | 18.57 | 20.52 | 9.35  | 0    | 0    | 2.29  |
|          | Garnet      | 37.61 | 21.47 | 35.62 | 3.06  | 1.8  | 0.86 | 0     |
|          | Plagioclase | 61.59 | 24.34 | 0.02  | -     | 5.69 | -    | -     |
|          | Muscovite   | 46.41 | 34.77 | 1.25  | 0.71  | 0.01 | 0.04 | 0.96  |
| JAB268A  | Biotite     | 35.72 | 17.83 | 22.35 | 8.3   | 0    | 0.21 | 2.5   |
|          | Garnet      | 37.19 | 20.92 | 27.53 | 1.83  | 2.61 | 9.74 | 0.01  |
|          | Plagioclase | 60.03 | 25.46 | 0.11  | -     | 6.76 | -    | -     |
|          | Muscovite   | 46.09 | 33.64 | 2.44  | 0.78  | 0    | 0.01 | 0.67  |
| JAB269B  | Biotite     | 35.57 | 18.49 | 22.5  | 8.27  | 0    | 0.08 | 1.97  |
|          | Garnet      | 37.64 | 21.04 | 33.78 | 2.51  | 1.28 | 3.91 | 0.01  |

|          |             |       |       |        |      |        |      |      |
|----------|-------------|-------|-------|--------|------|--------|------|------|
|          | Plagioclase | 62.17 | 24.15 | 0.13 - |      | 5.32 - | -    |      |
|          | Muscovite   | 46.73 | 34.6  | 1.77   | 0.73 | 0.03   | 0.02 | 0.44 |
| JAB277D1 | Biotite     | 35.76 | 18.94 | 22.45  | 8.21 | 0.03   | 0.14 | 1.38 |
|          | Garnet      | 37.44 | 20.8  | 32.84  | 2    | 2.01   | 5.41 | 0.1  |
|          | Plagioclase | 60.05 | 25.19 | 0.28 - |      | 6.59 - | -    |      |
|          | Muscovite   | 47.87 | 34.54 | 2.16   | 0.43 | 0.01   | 0.01 | 0.13 |

Background corrections for Mg, Al, Si, Ca, Fe, and Mn in garnet, rutile, and ilmenite were done using M whereas a LOP correction was used for Ti. In plagioclase, Na, Al, Si, K, and Ca were corrected for backg and Fe was corrected using LOP. For muscovite, Al, Si, and K analyses used MAN corrections while F, N and Fe used LOP corrections. Background corrections for biotite are the same as those for muscovite e correction is used for Fe in biotite.

| K2O  | Na2O  | F    | Total  |
|------|-------|------|--------|
| 9.14 | 0.11  | 0.13 | 95.38  |
| -    | -     | -    | 100.03 |
| 0.11 | 8.86  | -    | 99.73  |
| 9.58 | 0.79  | 0.1  | 94.06  |
| 9.24 | 0.22  | 0.13 | 95.77  |
| -    | -     | -    | 100.99 |
| 0.08 | 7.6   | -    | 99.73  |
| 9.62 | 0.85  | 0.12 | 93.97  |
| 8.92 | 0.22  | 0.05 | 96.25  |
| -    | -     | -    | 100.95 |
| 0.12 | 8.31  | -    | 100.25 |
| 9.84 | 0.73  | 0.15 | 95.27  |
| 8.66 | 0.12  | 0.32 | 95.01  |
| -    | -     | -    | 101.24 |
| 0.08 | 8.75  | -    | 99.42  |
| 9.56 | 0.89  | 0.14 | 94.97  |
| 8.11 | 0.13  | 0.47 | 95.1   |
| -    | -     | -    | 100.84 |
| 0.13 | 10.05 | -    | 100.19 |
| 9.58 | 0.65  | 0.08 | 94.12  |
| 9.12 | 0.11  | 0.21 | 96.06  |
| -    | -     | -    | 99.76  |
| 0.09 | 8.93  | -    | 99.97  |
| 9.28 | 0.99  | 0.08 | 94.48  |
| 8.6  | 0.13  | 0.39 | 95.02  |
| -    | -     | -    | 98.98  |
| 0.07 | 9.04  | -    | 99.35  |
| 9.31 | 0.91  | 0.12 | 95     |
| 8.46 | 0.14  | 0.63 | 95.04  |
| -    | -     | -    | 100.47 |
| 0.05 | 9.16  | -    | 98.99  |
| 9.05 | 1.06  | 0.12 | 94.31  |
| 9.27 | 0.14  | 0.13 | 95.83  |
| -    | -     | -    | 100.6  |
| 0.09 | 8.65  | -    | 99.78  |
| 9.26 | 1.28  | 0.11 | 95.14  |
| 8.84 | 0.32  | 0.21 | 95.86  |
| -    | -     | -    | 99.63  |
| 0.07 | 8.16  | -    | 99.72  |
| 9.01 | 1.39  | 0.09 | 94.74  |
| 9.17 | 0.1   | 0.06 | 96.26  |
| -    | -     | -    | 99.15  |
| 0.1  | 8.34  | -    | 99.61  |
| 9.7  | 0.83  | 0.11 | 94.83  |
| 8.78 | 0.08  | 0.21 | 95.08  |

|      |      |      |        |
|------|------|------|--------|
| -    | -    | -    | 99.85  |
| 0.09 | 8.2  | -    | 100    |
| 9.19 | 1.15 | 0.17 | 94.65  |
| 8.09 | 0.14 | 0.2  | 95.61  |
| -    | -    | -    | 100.33 |
| 0.06 | 7.35 | -    | 99.74  |
| 8.68 | 1.56 | 0.02 | 93.77  |
| 8.74 | 0.17 | 0.07 | 95.39  |
| -    | -    | -    | 99.76  |
| 0.07 | 9.08 | -    | 99.36  |
| 8.7  | 1.33 | 0    | 92.91  |
| 8.96 | 0.13 | 0.08 | 95.25  |
| -    | -    | -    | 100.56 |
| 0.48 | 7.56 | -    | 99.42  |
| 8.83 | 1.11 | 0.05 | 94.92  |
| 8.62 | 0.17 | 0.34 | 95.62  |
| -    | -    | -    | 99.48  |
| 0.08 | 8.88 | -    | 99.52  |
| 9.5  | 0.87 | 0.16 | 94.83  |
| 8.69 | 0.05 | 0.35 | 95.5   |
| -    | -    | -    | 100.52 |
| 0.09 | 8.06 | -    | 100.11 |
| 8.62 | 1.69 | 0.05 | 95.04  |
| 8.67 | 0.14 | 0.31 | 95.4   |
| -    | -    | -    | 100.14 |
| 0.07 | 8.85 | -    | 99.73  |
| 9.04 | 1.33 | 0.06 | 94.44  |
| -    | -    | -    | 99.63  |
| -    | -    | -    | 99.94  |
| 8.98 | 0.27 | 0.13 | 96.26  |
| -    | -    | -    | 101.04 |
| 0.08 | 8    | -    | 99.96  |
| 9.56 | 0.92 | 0.08 | 95.27  |
| 8.64 | 0.26 | 0.16 | 95.44  |
| -    | -    | -    | 99.88  |
| 0.08 | 8.41 | -    | 99.82  |
| 9.38 | 1.05 | 0.04 | 93.34  |
| 9.01 | 0.24 | 0.23 | 95.61  |
| -    | -    | -    | 99.25  |
| 0.08 | 8.01 | -    | 99.92  |
| 9.62 | 0.88 | 0.1  | 94.44  |
| 8.57 | 0.24 | 0.13 | 95.64  |
| -    | -    | -    | 100.42 |
| 0.08 | 8.21 | -    | 99.93  |
| 9.47 | 1.07 | 0.04 | 94.73  |
| 9.28 | 0.06 | 0.13 | 96.38  |
| -    | -    | -    | 99.83  |
| 0.1  | 7.21 | -    | 99.67  |
| 9.93 | 0.64 | 0.06 | 94.26  |
| 9.04 | 0.13 | 0.02 | 96.07  |
| -    | -    | -    | 100.17 |

|   |      |        |      |        |
|---|------|--------|------|--------|
|   | 0.09 | 8.33 - |      | 100.19 |
|   | 9.14 | 1.08   | 0.07 | 94.61  |
|   | 8.75 | 0.37   | 0.02 | 96.05  |
| - | -    | -      |      | 100.6  |
|   | 0.15 | 7.44 - |      | 99.7   |
|   | 8.66 | 1.5    | 0.02 | 95.33  |

AN corrections,  
round using MAN  
lg, Na, Ca, Ti, Mn,  
except the MAN
