# Supplementary material
Source: publisher figshare collection journal article supplement (https://geolsoc.figshare.com/articles/dataset/_/3452954)
Supplement: Supplementary file 6 [file 1]

Supplementary Table 8. Grs and Mg# compositions of garnets and anorthite compositions of feldspars

| Point # | XGrs  | Mg#  | XAn    |
|---------|-------|------|--------|
| 1       | 0.105 | 0.12 | 0.475  |
| 2a      | 0.11  | 0.12 | 0.495  |
| 2b      | 0.13  | 0.1  | 0.525  |
| 3       | 0.125 | 0.12 | 0.45   |
| 4       | 0.2   | 0.12 | no fsp |
| 5       | 0.074 | 0.15 | 0.335  |
| 6       | 0.074 | 0.15 | 0.34   |

used in Figs. 13 and 14
