# Supplementary material
Source: publisher figshare collection journal article supplement (https://geolsoc.figshare.com/articles/dataset/_/3452954)
Supplement: Supplementary file 7 [file 1]

Supplementary Table 6. Structural formulae of ilmenite and rutile in JAB 257A used for thermobaromet

| Mineral  | Si     | Al     | Fe     | Mg     | Ca     | Mn     | Ti     |
|----------|--------|--------|--------|--------|--------|--------|--------|
| Ilmenite | 0.0008 | 0.0006 | 1.0263 | 0.0126 | 0.0025 | 0.0058 | 0.9752 |
| Rutile   | 0.0031 | 0.006  | 0.0069 | 0      | 0.001  | 0.0009 | 0.9881 |

try.
