# Supplementary material
Source: publisher figshare collection journal article supplement (https://geolsoc.figshare.com/articles/dataset/_/3452954)
Supplement: Supplementary file 8 [file 1]

Supplementary Table 3. Structural formulae of biotite used for thermobarometry.

| Sample   | nar | Si     | Aliv   | Alvi   | Fe2+   | Ca     | Na     | K      | Mg     |
|----------|-----|--------|--------|--------|--------|--------|--------|--------|--------|
| JAB15D   |     | 2.7369 | 1.2631 | 0.3671 | 1.2687 | 0.0024 | 0.0162 | 0.8876 | 1.0555 |
| JAB18A   |     | 2.7476 | 1.2524 | 0.4486 | 1.1944 | 0.0008 | 0.0321 | 0.887  | 0.1376 |
| JAB21B   |     | 2.7196 | 1.2804 | 0.4294 | 1.4284 | 0      | 0.0325 | 0.8666 | 0.8493 |
| JAB146A1 |     | 2.8401 | 1.1599 | 0.3811 | 1.1962 | 0.0016 | 0.0176 | 0.8335 | 1.1845 |
| JAB152A3 |     | 2.807  | 1.193  | 0.3574 | 1.4064 | 0.0025 | 0.0193 | 0.7912 | 1.0011 |
| JAB156A1 |     | 2.7306 | 1.2694 | 0.3706 | 1.3691 | 0.0008 | 0.0162 | 0.8851 | 0.9653 |
| JAB159A  |     | 2.7979 | 1.2021 | 0.3677 | 1.1358 | 0.0016 | 0.0189 | 0.8246 | 1.2753 |
| JAB160A  |     | 2.8063 | 1.1937 | 0.3858 | 1.0974 | 0      | 0.0205 | 0.814  | 1.326  |
| JAB161A  |     | 2.7438 | 1.2562 | 0.3502 | 1.3957 | 0      | 0.0208 | 0.9045 | 1.0252 |
| JAB162A  |     | 2.7277 | 1.2723 | 0.3688 | 1.2738 | 0.0008 | 0.0469 | 0.8525 | 1.1383 |
| JAB164A  |     | 2.7472 | 1.2528 | 0.3323 | 1.4336 | 0      | 0.0148 | 0.8929 | 0.9616 |
| JAB235A1 |     | 2.7731 | 1.2269 | 0.3502 | 1.373  | 0.0025 | 0.0119 | 0.8589 | 1.0541 |
| JAB240D1 |     | 2.746  | 1.254  | 0.4288 | 1.1646 | 0.0024 | 0.0203 | 0.7703 | 1.2252 |
| JAB242A  |     | 2.7447 | 1.2553 | 0.3963 | 1.2167 | 0.0008 | 0.0249 | 0.8418 | 1.1516 |
| JAB245A  |     | 2.7537 | 1.2463 | 0.4149 | 1.1573 | 0      | 0.019  | 0.8606 | 1.1866 |
| JAB253A  |     | 2.7393 | 1.2607 | 0.4165 | 1.4286 | 0.0025 | 0.0252 | 0.8409 | 0.9212 |
| JAB255A  |     | 2.7308 | 1.2692 | 0.3542 | 1.2748 | 0.0008 | 0.0073 | 0.8399 | 1.1962 |
| JAB257A  |     | 2.765  | 1.235  | 0.364  | 1.2688 | 0      | 0.0206 | 0.8378 | 1.1497 |
| JAB258D  |     | 2.7231 | 1.2769 | 0.3903 | 1.2799 | 0.0016 | 0.0394 | 0.8629 | 1.0298 |
| JAB261B1 |     | 2.7089 | 1.2911 | 0.3706 | 1.3197 | 0.0008 | 0.0384 | 0.8391 | 1.059  |
| JAB262A1 |     | 2.7214 | 1.2786 | 0.3684 | 1.2874 | 0.0016 | 0.0353 | 0.8729 | 1.0202 |
| JAB264A2 |     | 2.7247 | 1.2753 | 0.3825 | 1.2998 | 0      | 0.0352 | 0.8281 | 1.0559 |
| JAB268A  |     | 2.7259 | 1.2741 | 0.3294 | 1.4262 | 0      | 0.0089 | 0.9034 | 0.9443 |
| JAB269B  |     | 2.7186 | 1.2814 | 0.384  | 1.438  | 0      | 0.0193 | 0.8813 | 0.9423 |
| JAB277D1 |     | 2.7277 | 1.2723 | 0.4303 | 1.4319 | 0.0025 | 0.0547 | 0.8514 | 0.9336 |

| Mn     | Ti     | F      |
|--------|--------|--------|
| 0.0174 | 0.1346 | 0.0313 |
| 0.0108 | 0.0674 | 0.0309 |
| 0.0142 | 0.1243 | 0.012  |
| 0      | 0.0812 | 0.0763 |
| 0.0078 | 0.0903 | 0.1137 |
| 0.009  | 0.1293 | 0.0505 |
| 0      | 0.0842 | 0.0927 |
| 0.0032 | 0.0873 | 0.1502 |
| 0.0032 | 0.1001 | 0.0314 |
| 0.0019 | 0.0967 | 0.0502 |
| 0.0065 | 0.1326 | 0.0145 |
| 0.0039 | 0.0969 | 0.0509 |
| 0.0032 | 0.0848 | 0.0472 |
| 0.0045 | 0.109  | 0.0167 |
| 0.0013 | 0.1031 | 0.019  |
| 0.0078 | 0.0857 | 0.0822 |
| 0.0019 | 0.0821 | 0.0839 |
| 0.0032 | 0.0917 | 0.0743 |
| 0.0019 | 0.1365 | 0.031  |
| 0.0013 | 0.1254 | 0.0385 |
| 0.0019 | 0.1468 | 0.0552 |
| 0      | 0.1305 | 0.0311 |
| 0.0136 | 0.1435 | 0.0314 |
| 0.0052 | 0.1132 | 0.0048 |
| 0.009  | 0.0792 | 0.0048 |
