# Supplementary material
Source: publisher figshare collection journal article supplement (https://geolsoc.figshare.com/articles/dataset/_/3452954)
Supplement: Supplementary file 9 [file 1]

Supplementary Table 7. Bulk chemical compositions of samples used for pseudosections

|        | SiO <sub>2</sub> | TiO <sub>2</sub> | Al <sub>2</sub> O <sub>3</sub> | Fe <sub>2</sub> O <sub>3</sub> | Total FeO | MnO  | MgO  | CaO  |
|--------|------------------|------------------|--------------------------------|--------------------------------|-----------|------|------|------|
| JAB46B | 46.8             | 1.01             | 27.4                           | 9.56                           | 6.5       | 0.23 | 1.66 | 1.08 |
| JAB62A | 47.8             | 1.13             | 27.2                           | 10.7                           | 8         | 0.22 | 1.62 | 1.7  |

  

|  | Na <sub>2</sub> O | K <sub>2</sub> O | P <sub>2</sub> O <sub>5</sub> | Cr <sub>2</sub> O <sub>3</sub> | LOI  | Total |
|--|-------------------|------------------|-------------------------------|--------------------------------|------|-------|
|  | 1.39              | 6.95             | 0.1                           | 0.03                           | 2.85 | 99.2  |
|  | 1.53              | 4.53             | 0.11                          | 0.03                           | 2.15 | 98.8  |

  

|        | Rb  | Sr  | Y  | Zr  | Nb | Ba   |
|--------|-----|-----|----|-----|----|------|
| JAB46B | 219 | 106 | 35 | 130 | 19 | 1200 |
| JAB62A | 141 | 125 | 33 | 185 | 21 | 901  |

Notes: Oxides and loss on ignition (LOI) tabulated as wt. %; trace elements in ppm.

Fe<sub>2</sub>O<sub>3</sub> total is total iron taken as Fe<sub>2</sub>O<sub>3</sub>; FeO is wet-chemically determined.

Totals include trace elements summed as oxides.

Analytical methods described in Ague et al. (2001).
